# Supplementary material for: Body Composition Predicts Survival in Patients with Hepatocellular Carcinoma Treated with Transarterial Chemoembolization
Source: PubMed Central journal article supplement — Cancer Res Treat. 2017 Jun 1;50(2):530–7. doi: 10.4143/crt.2017.156 (PMC5912126; doi:10.4143/crt.2017.156), 2017-06-01
Supplement: crt-2017-156-suppl1.pdf [file crt-2017-156-suppl1.pdf]

## Supplementary Materials

**S1 Table.** Summary of body composition features in validation cohort

| Morphomic Variable (at T11)                                                            | Raw values |                |                | Percentiles |                |                |
|----------------------------------------------------------------------------------------|------------|----------------|----------------|-------------|----------------|----------------|
|                                                                                        | Median     | Q <sub>1</sub> | Q <sub>3</sub> | Median      | Q <sub>1</sub> | Q <sub>3</sub> |
| Distance from the fascia to the vertebra (mm)                                          | 165        | 149            | 181            | 75          | 52             | 89             |
| Area of all muscle in the dorsal muscle group (mm <sup>2</sup> )                       | 3,380      | 2,756          | 3,854          | 40          | 19             | 65             |
| Ratio of normal density muscle to the dorsal muscle area (ratio)                       | 0.40       | 0.25           | 0.60           | 72          | 54             | 89             |
| Low density dorsal muscle area (mm <sup>2</sup> )                                      | 927        | 589            | 1179           | 66          | 41             | 87             |
| Normal density dorsal muscle area (mm <sup>2</sup> )                                   | 2,350      | 1,748          | 3,035          | 30          | 17             | 51             |
| Total fascia circumference (mm)                                                        | 965        | 892            | 1,009          | 62          | 42             | 85             |
| Eccentricity of an ellipse having the same second-moments of the fascia region (ratio) | 0.61       | 0.56           | 0.66           | 28          | 10             | 52             |
| Total area within the fascia region (mm <sup>2</sup> )                                 | 70,131     | 59,495         | 76,490         | 66          | 45             | 85             |
| Subcutaneous fat area (mm <sup>2</sup> )                                               | 9,501      | 6,062          | 12,967         | 54          | 33             | 72             |
| Bone mineral density (HU)                                                              | 180        | 152            | 216            | 47          | 23             | 74             |
| Visceral fat density (HU)                                                              | -91        | -98            | -84            | 72          | 38             | 88             |
| Visceral fat area (mm <sup>2</sup> )                                                   | 8,246      | 4,563          | 14,666         | 39          | 19             | 56             |

Q<sub>1</sub> is the 1st quartile and Q<sub>3</sub> is the 3rd quartile. The percentile version was referenced against a normal population controlling for age and gender, which are unitless. The units for raw values were specified in the row names. The smaller eccentricity indicates a more rounder body shape. HU, Hounsfield Units.
