# Supplementary material for: Body Composition Predicts Survival in Patients with Hepatocellular Carcinoma Treated with Transarterial Chemoembolization
Source: PubMed Central journal article supplement — Cancer Res Treat. 2017 Jun 1;50(2):530–7. doi: 10.4143/crt.2017.156 (PMC5912126; doi:10.4143/crt.2017.156), 2017-06-01
Supplement: crt-2017-156-suppl2.pdf [file crt-2017-156-suppl2.pdf]

**S2 Table.** Morphomic descriptive data of derivation and validation cohorts

| Morphomic Variable Percentile<br>(at T11)                                            | Derivation<br>Cohort (n=75) | Validation Cohort<br>(n=90) | p-value |
|--------------------------------------------------------------------------------------|-----------------------------|-----------------------------|---------|
| Distance from the fascia to the<br>vertebra                                          | 62 (39-80)                  | 75 (52-89)                  | 0.02    |
| Area of all muscle in the dorsal<br>muscle group                                     | 46 (28-69)                  | 40 (19-65)                  | 0.14    |
| Ratio of normal density muscle to<br>the dorsal muscle area                          | 70 (40-93)                  | 72 (54-89)                  | 0.80    |
| Low density dorsal muscle area                                                       | 69 (37-94)                  | 66 (41-87)                  | 0.53    |
| Normal density dorsal muscle<br>area                                                 | 37 (21-57)                  | 30 (17-51)                  | 0.23    |
| Total fascia circumference                                                           | 48 (24-70)                  | 62 (42-85)                  | 0.01    |
| Eccentricity of an ellipse having<br>the same second-moments of the<br>fascia region | 29 (12-47)                  | 28 (10-52)                  | 0.76    |
| Total area within the fascia region                                                  | 54 (25-74)                  | 66 (45-85)                  | 0.01    |
| Subcutaneous fat area                                                                | 46 (26-73)                  | 54 (33-72)                  | 0.57    |
| Bone mineral density                                                                 | 50 (29-79)                  | 47 (23-74)                  | 0.41    |
| Visceral fat density                                                                 | 50 (25-83)                  | 72 (38-88)                  | 0.01    |
| Visceral fat area                                                                    | 30 (19-43)                  | 39 (19-56)                  | 0.10    |

Median and interquartile were shown, and p-values were from Mann-Whitney U test.
