# Supplementary material for: Body Composition Predicts Survival in Patients with Hepatocellular Carcinoma Treated with Transarterial Chemoembolization
Source: PubMed Central journal article supplement — Cancer Res Treat. 2017 Jun 1;50(2):530–7. doi: 10.4143/crt.2017.156 (PMC5912126; doi:10.4143/crt.2017.156), 2017-06-01
Supplement: crt-2017-156-suppl4.pdf [file crt-2017-156-suppl4.pdf]

**S4 Table.** The logistic regression model for predicting decompensation after transarterial chemoembolization

| Variable              | Odds ratio | p-values |
|-----------------------|------------|----------|
| Visceral fat density  | 1.05       | < 0.001  |
| Visceral fat area     | 1.05       | 0.03     |
| Subcutaneous fat area | 0.97       | 0.06     |
