# Supplementary figures and images for: Body Composition Predicts Survival in Patients with Hepatocellular Carcinoma Treated with Transarterial Chemoembolization
Source: PubMed Central journal article supplement — Cancer Res Treat. 2017 Jun 1;50(2):530–7. doi: 10.4143/crt.2017.156 (PMC5912126; doi:10.4143/crt.2017.156), 2017-06-01

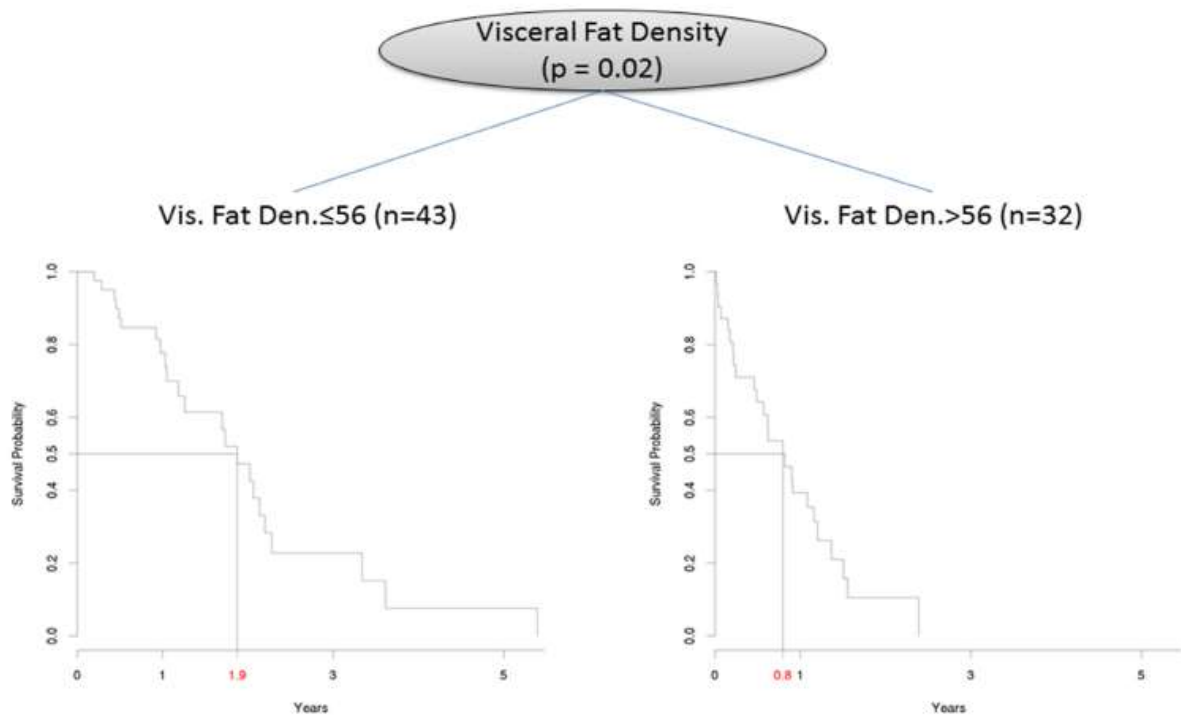

**S3 Fig.** Conditional inference tree schema.

Supplement: crt-2017-156-suppl3.pdf [file crt-2017-156-suppl3.pdf]
